# Supplementary material for: Noradrenergic deficits contribute to apathy in Parkinson’s disease through the precision of expected outcomes
Source: PubMed Central journal article supplement (PMC9119485; doi:10.1371/journal.pcbi.1010079), 2022-05-09

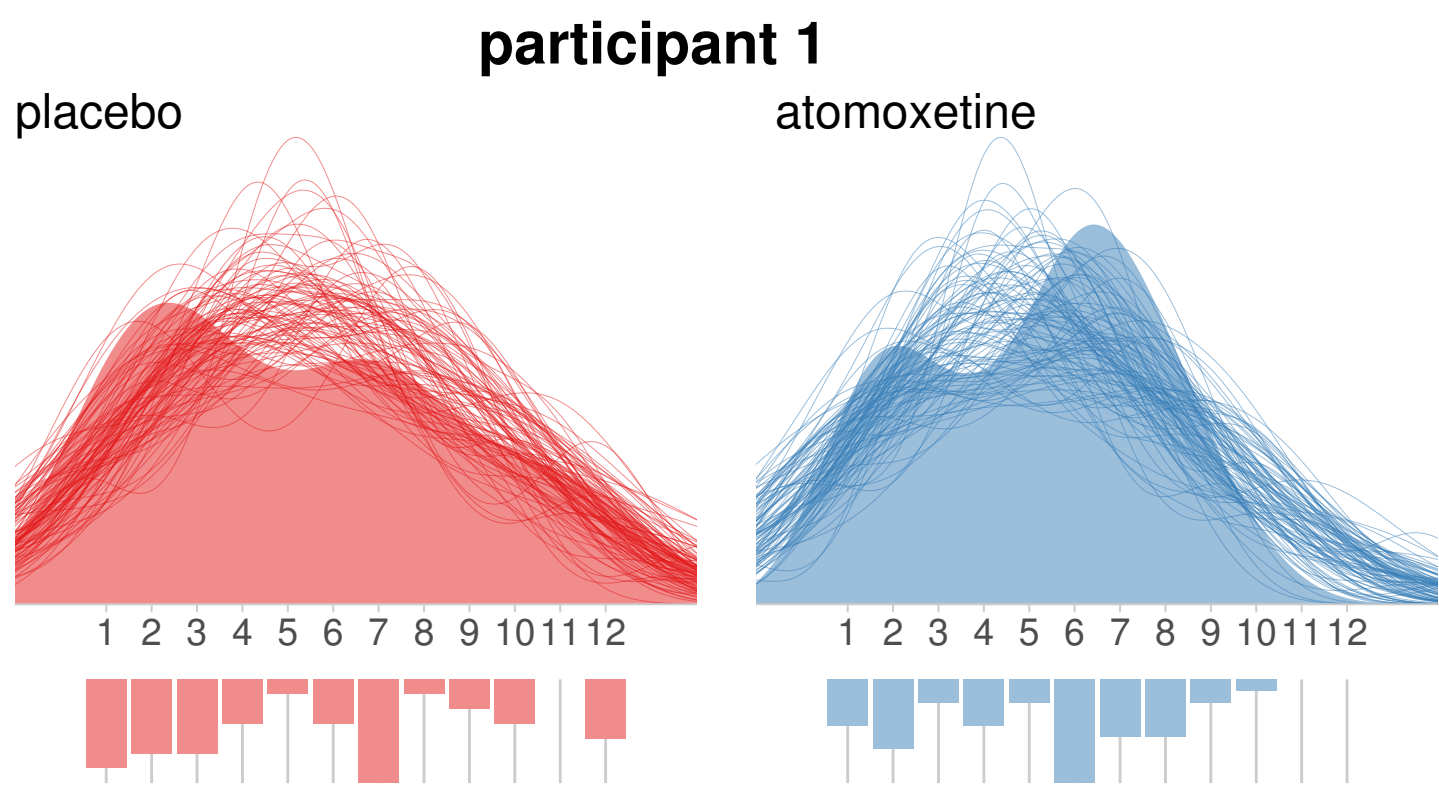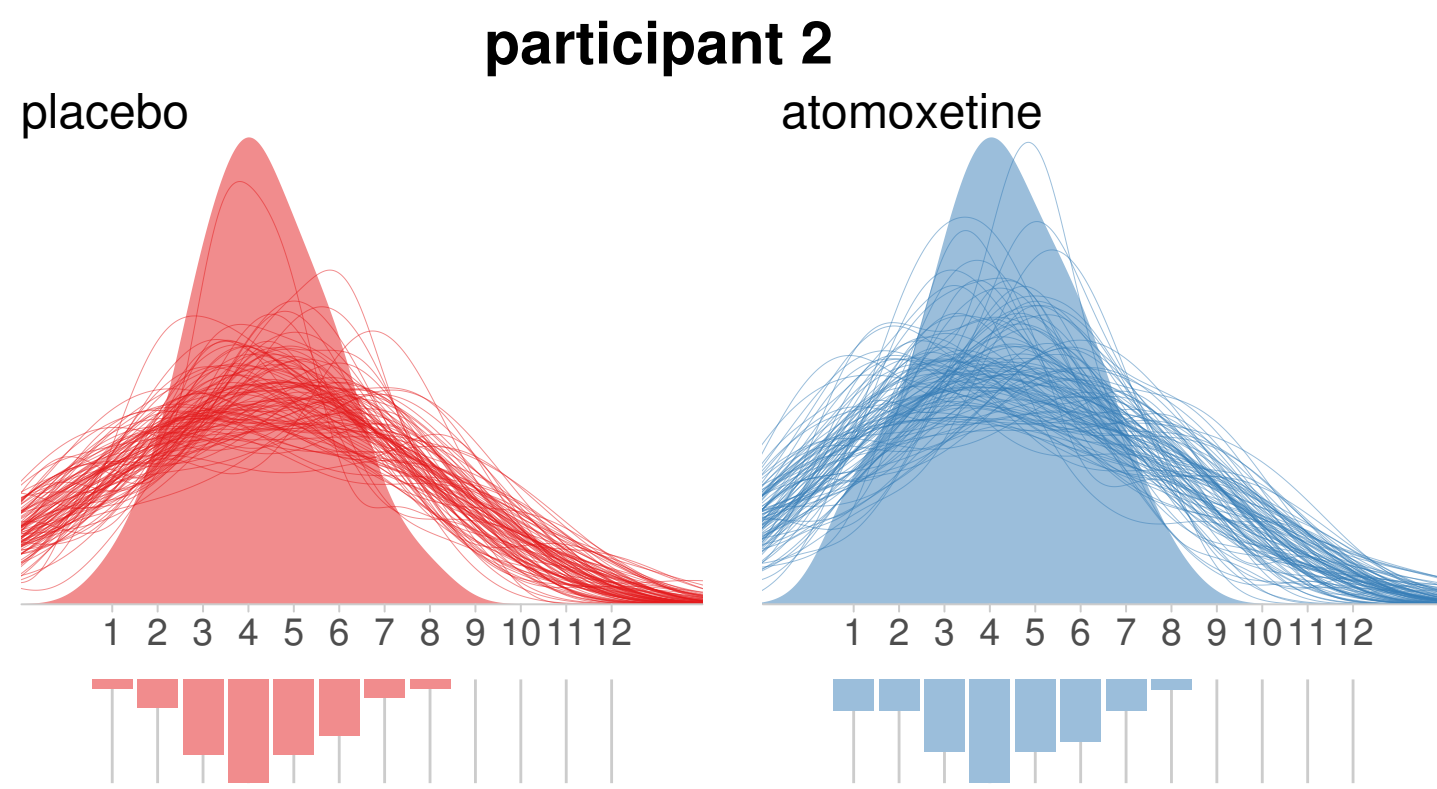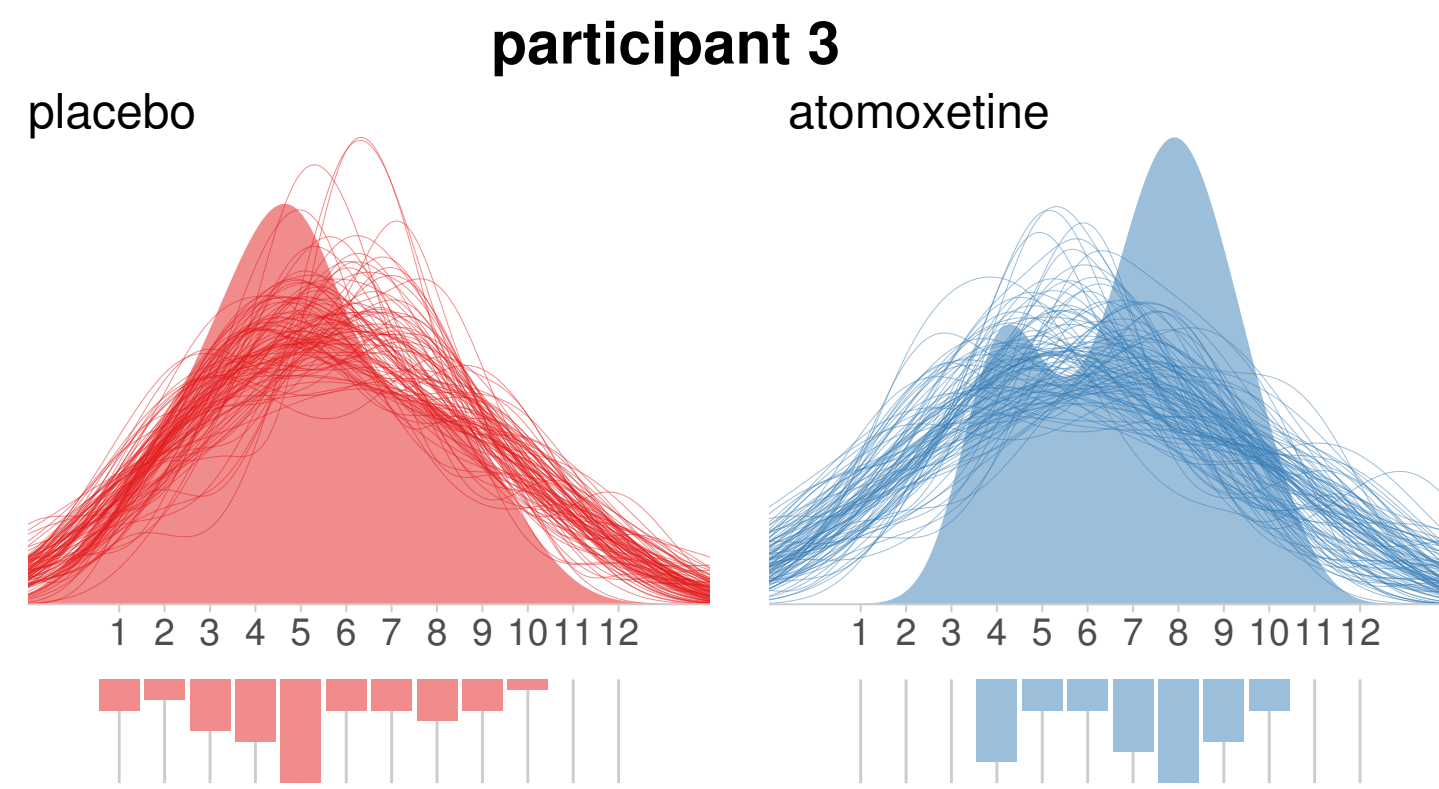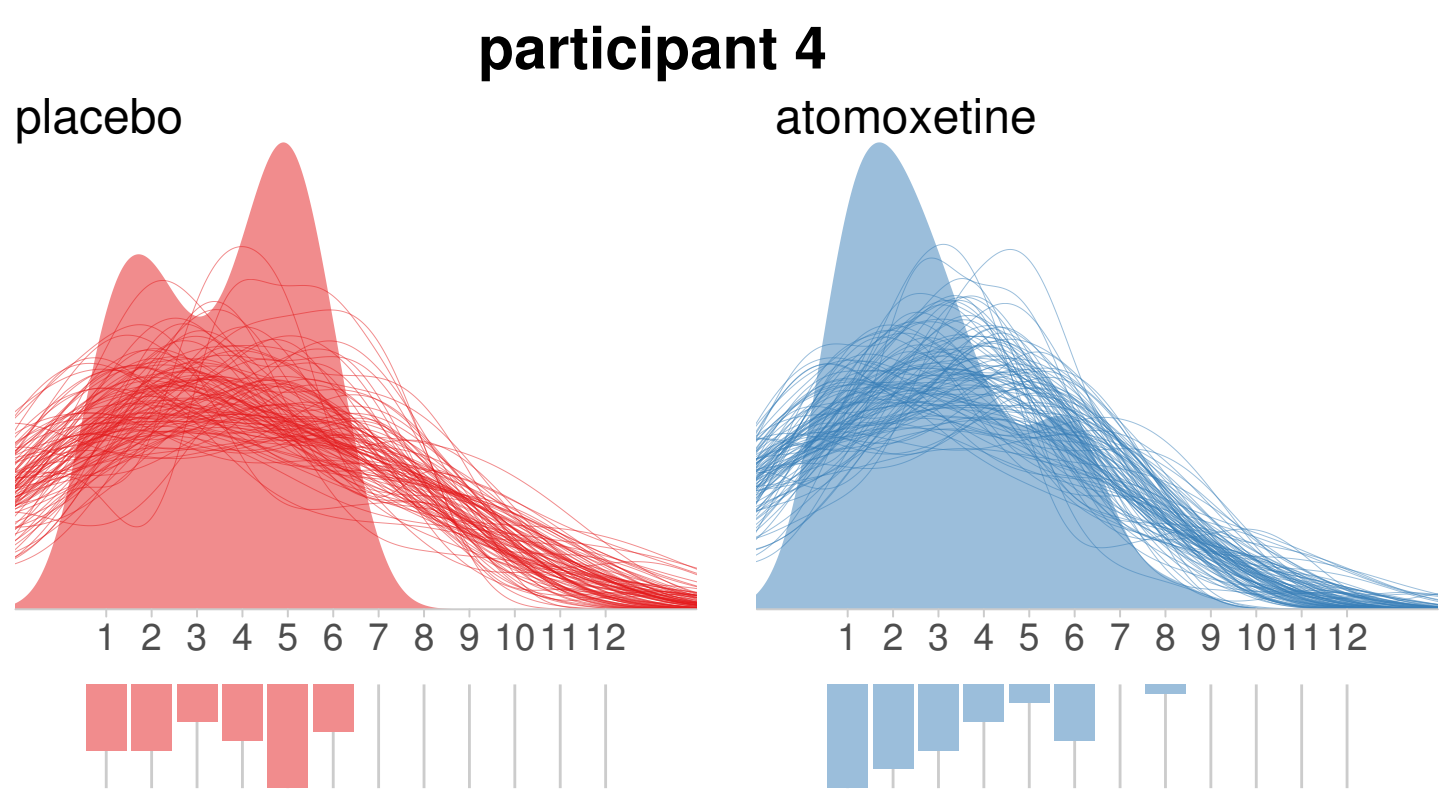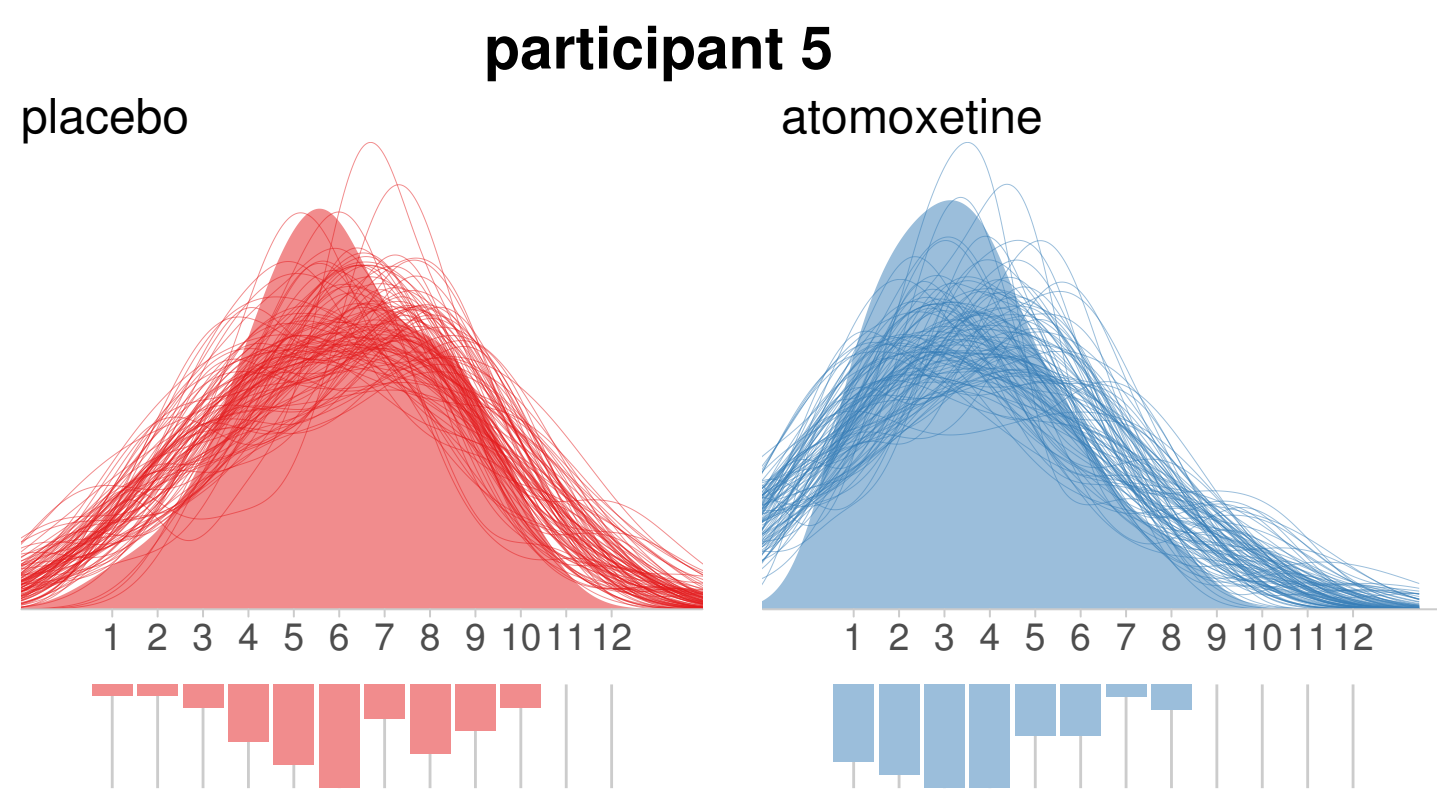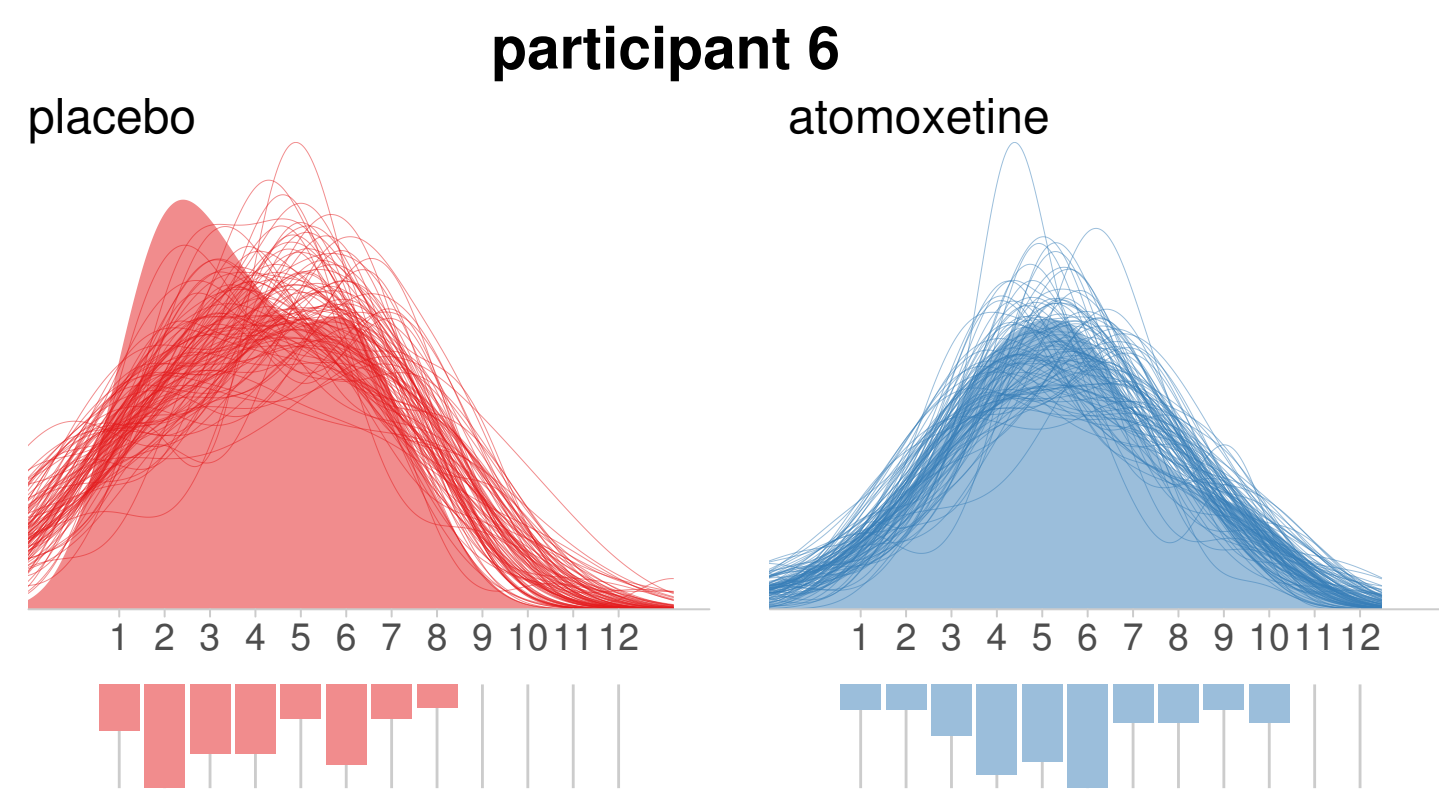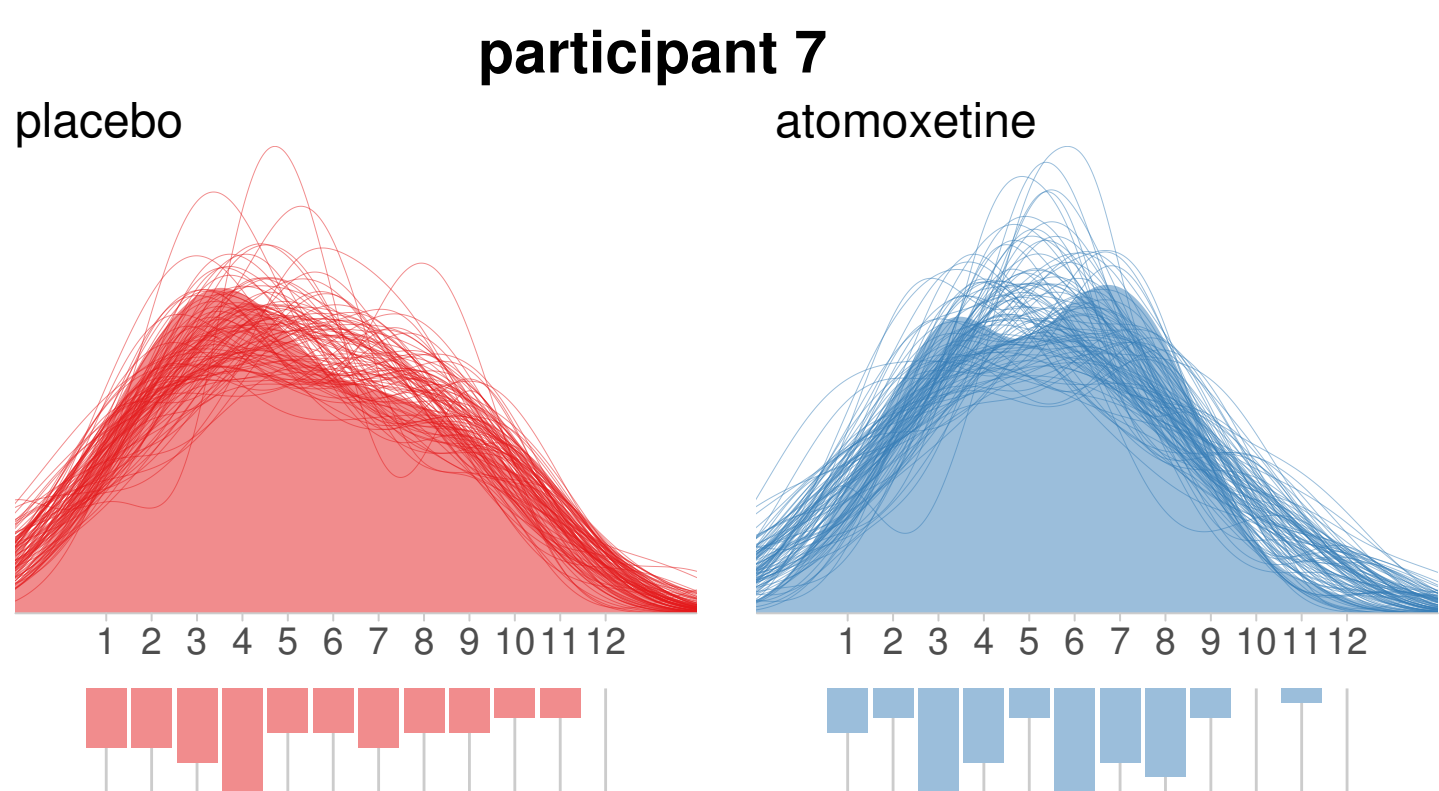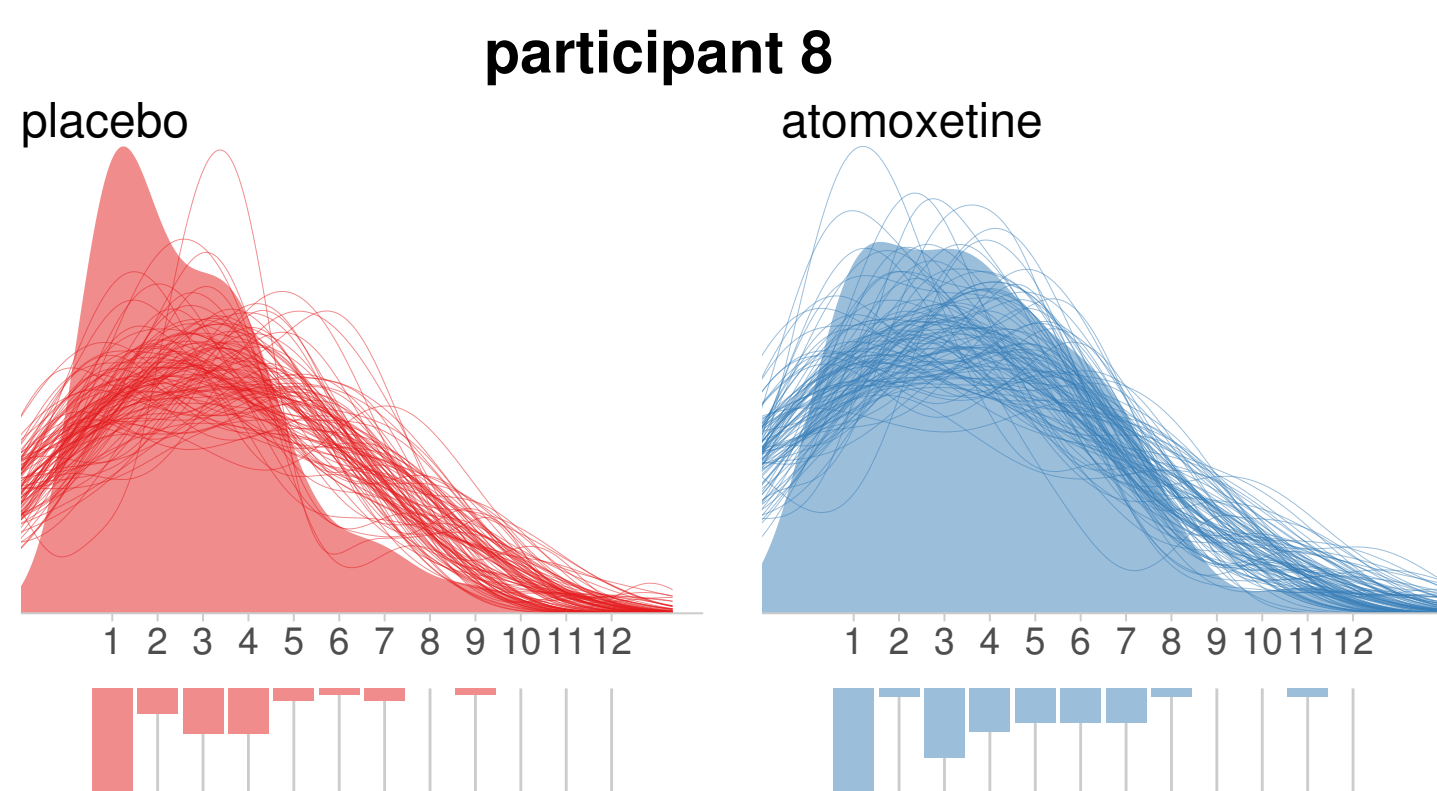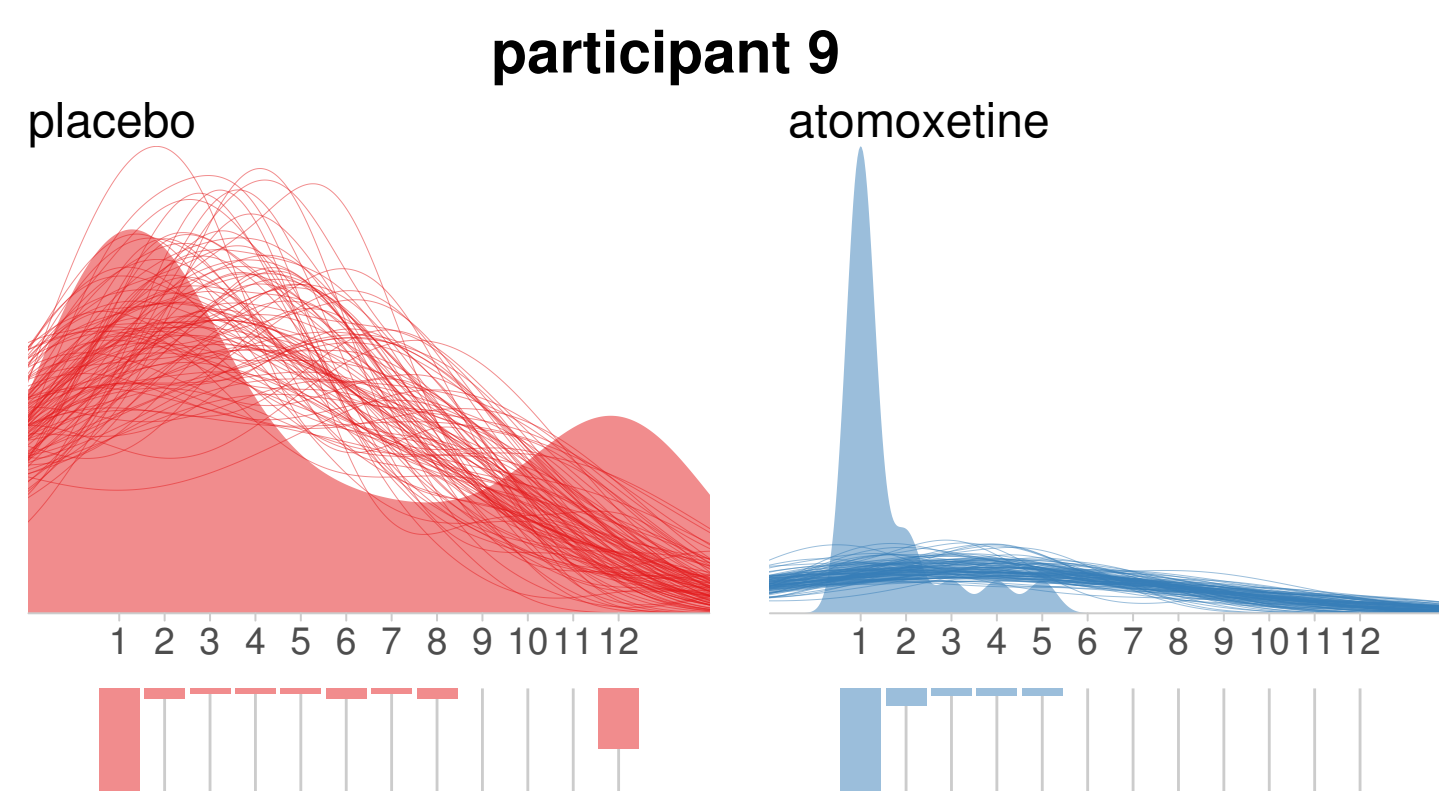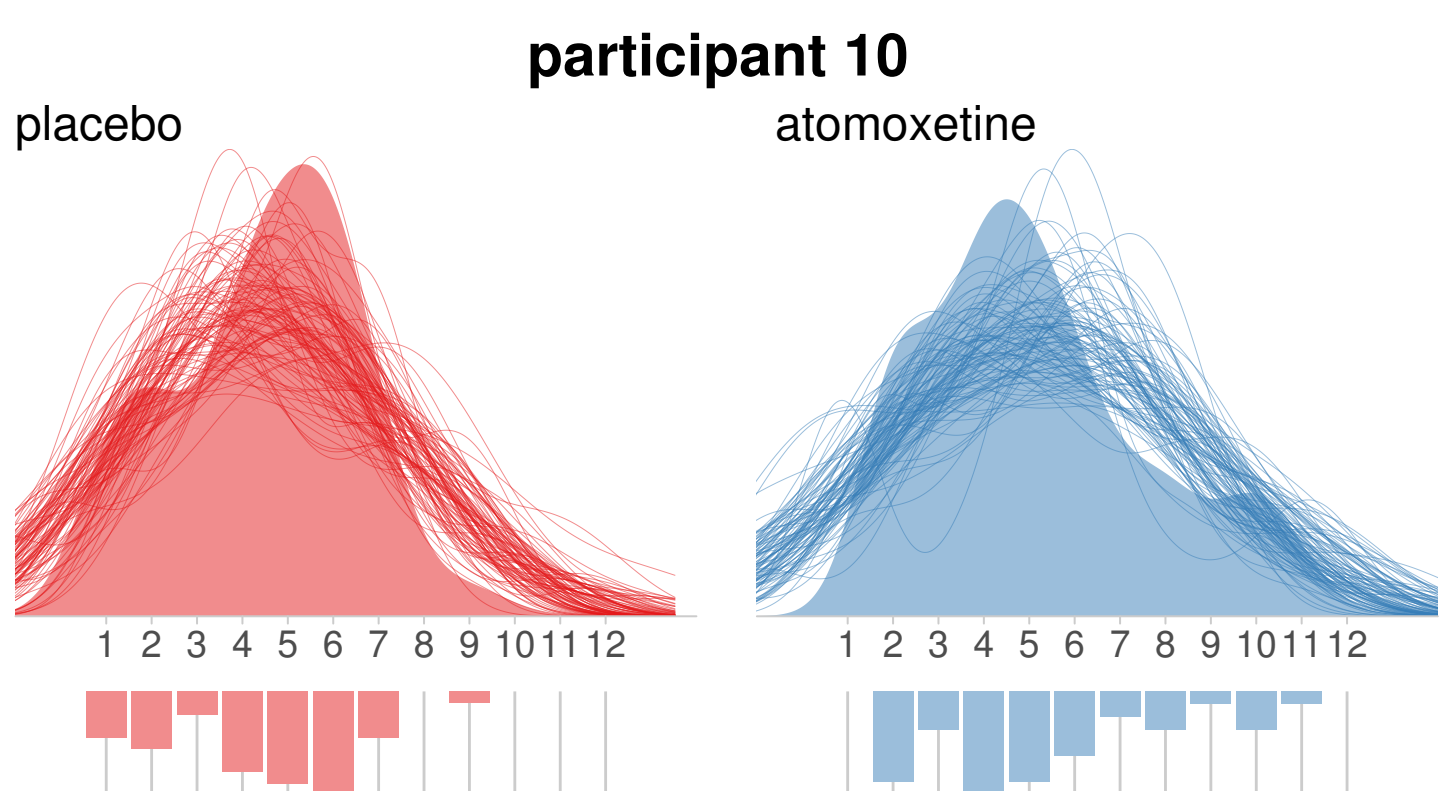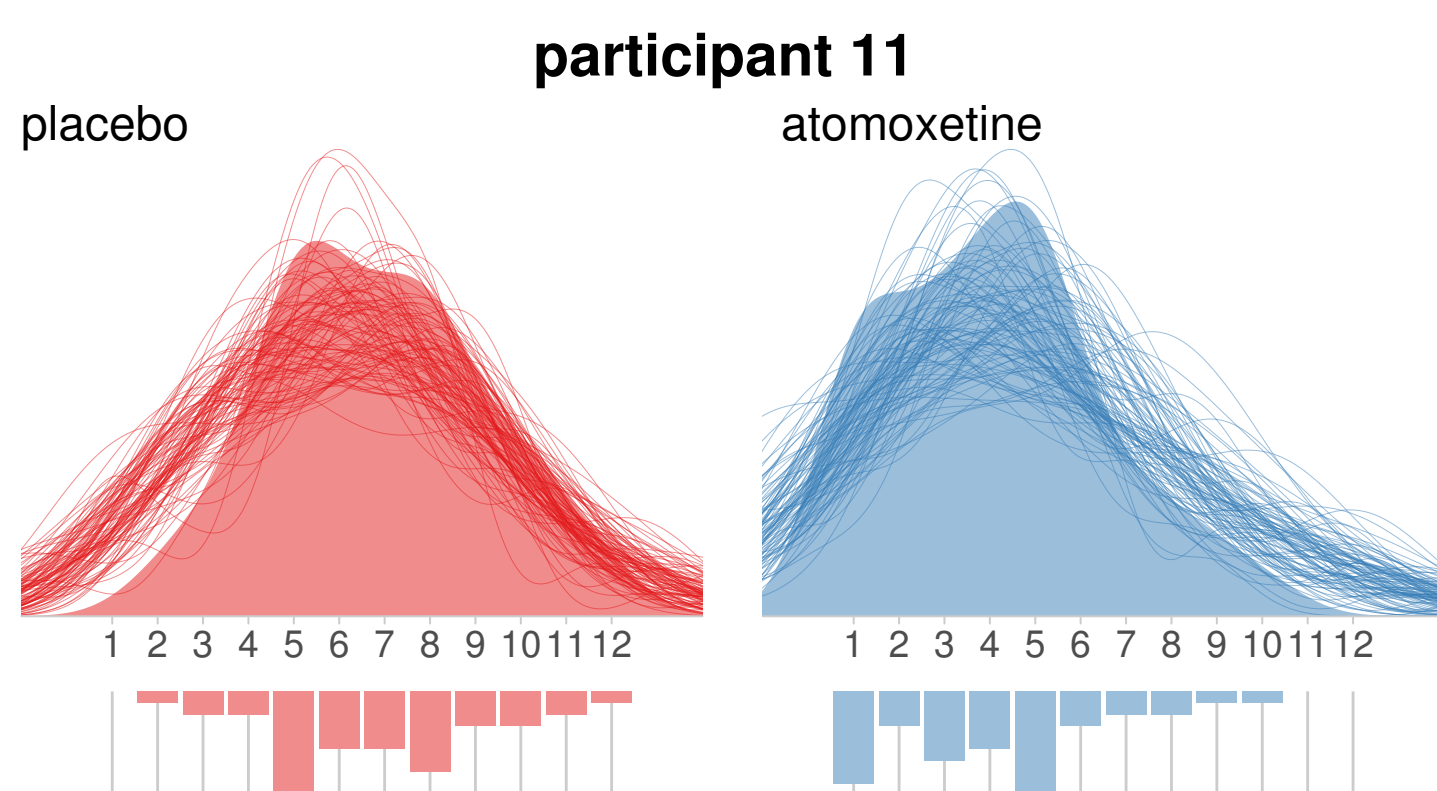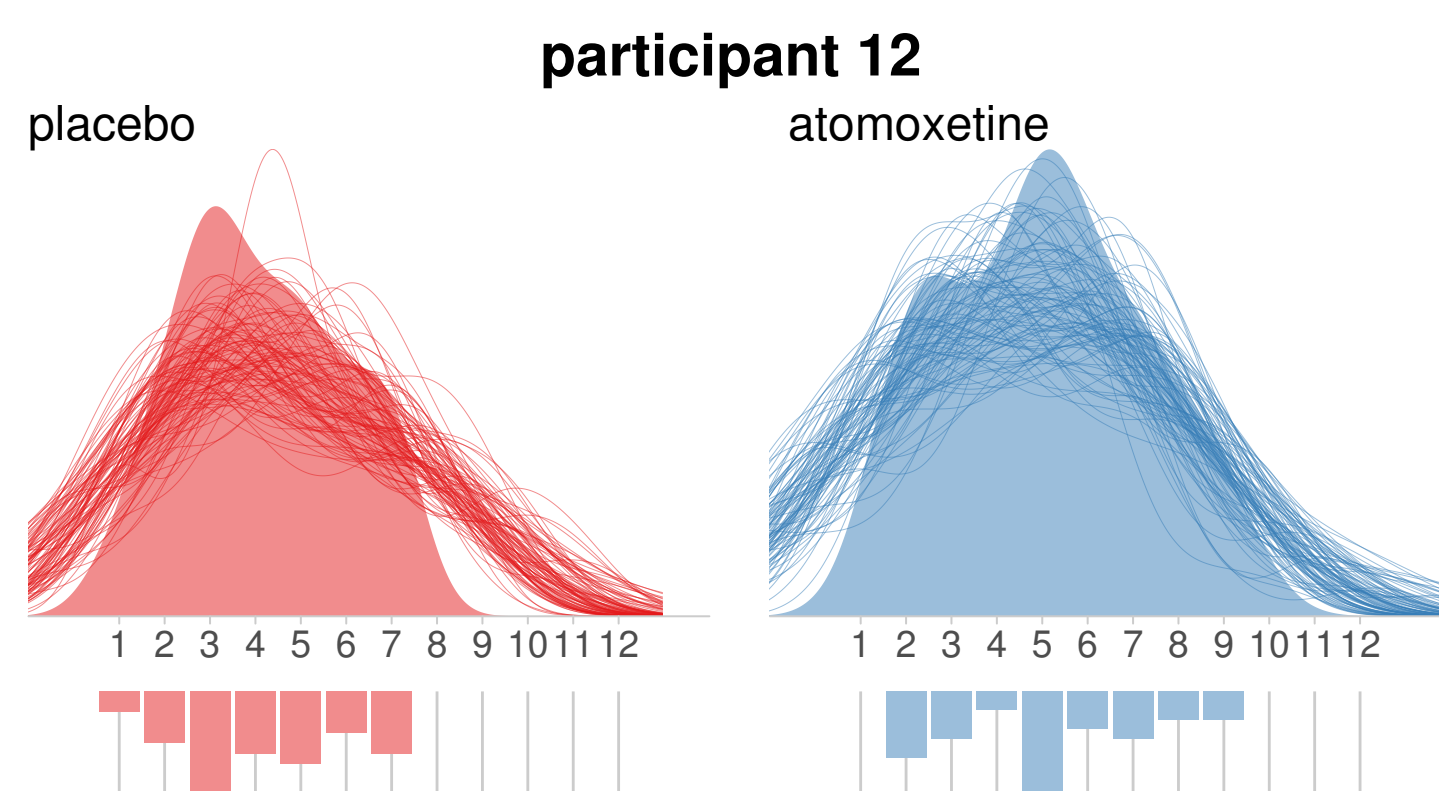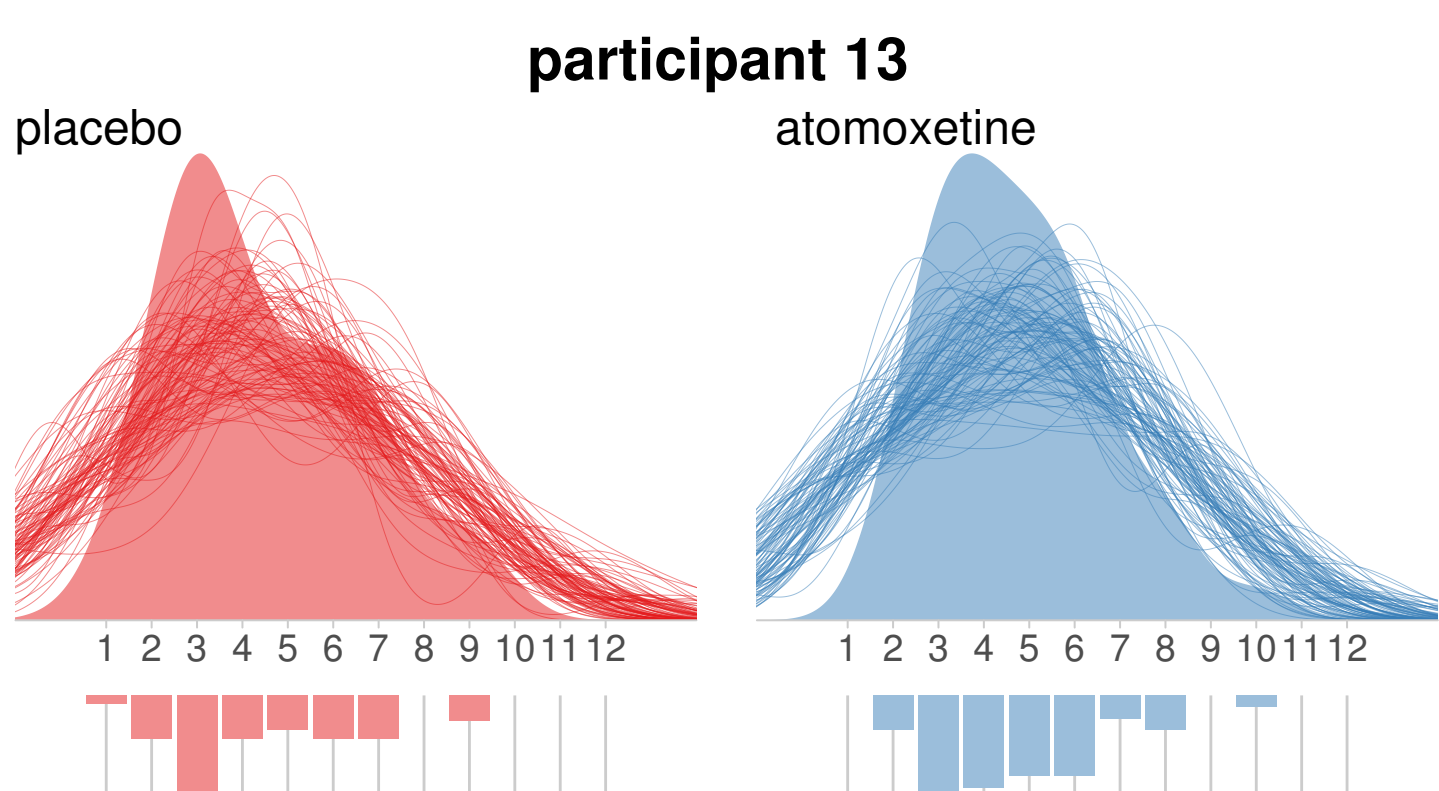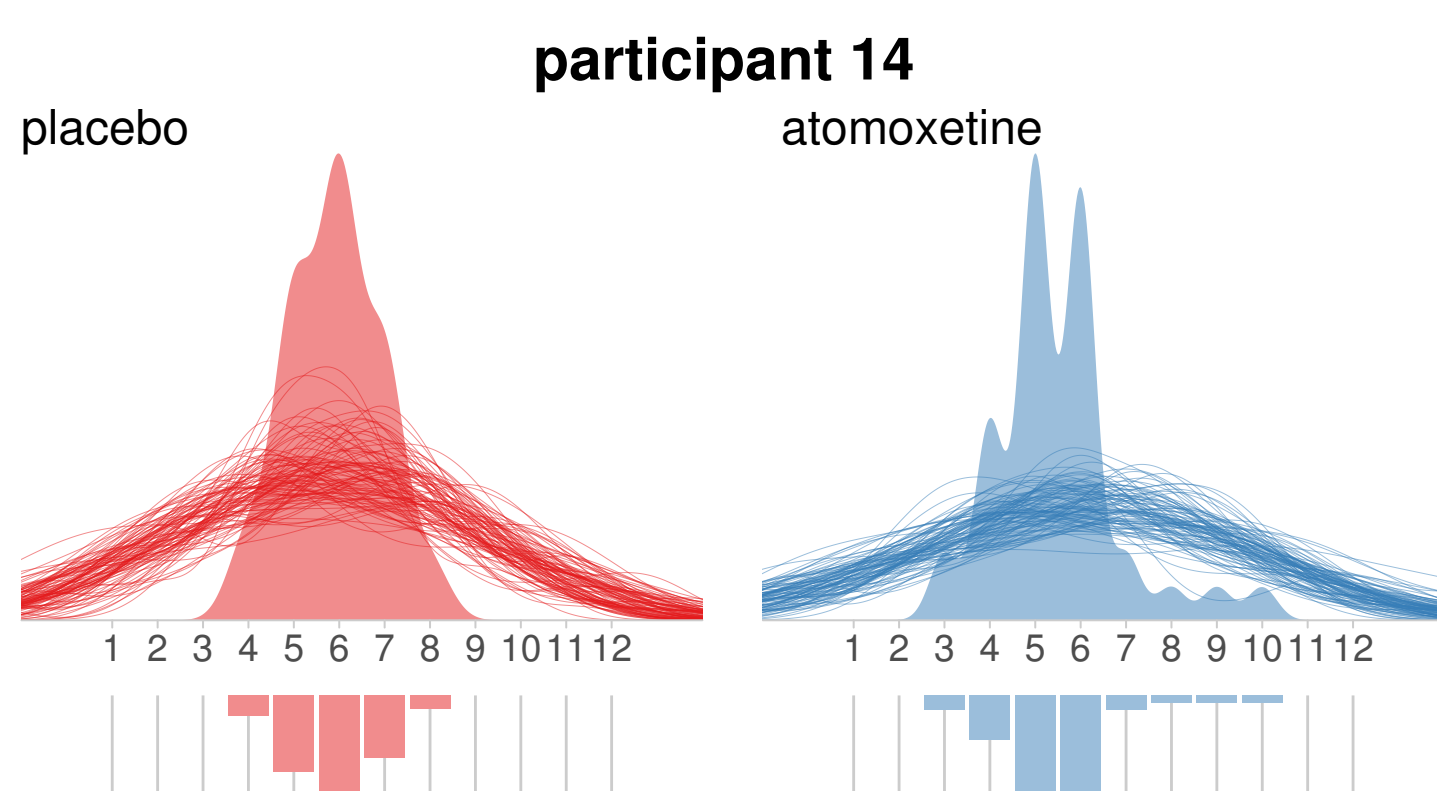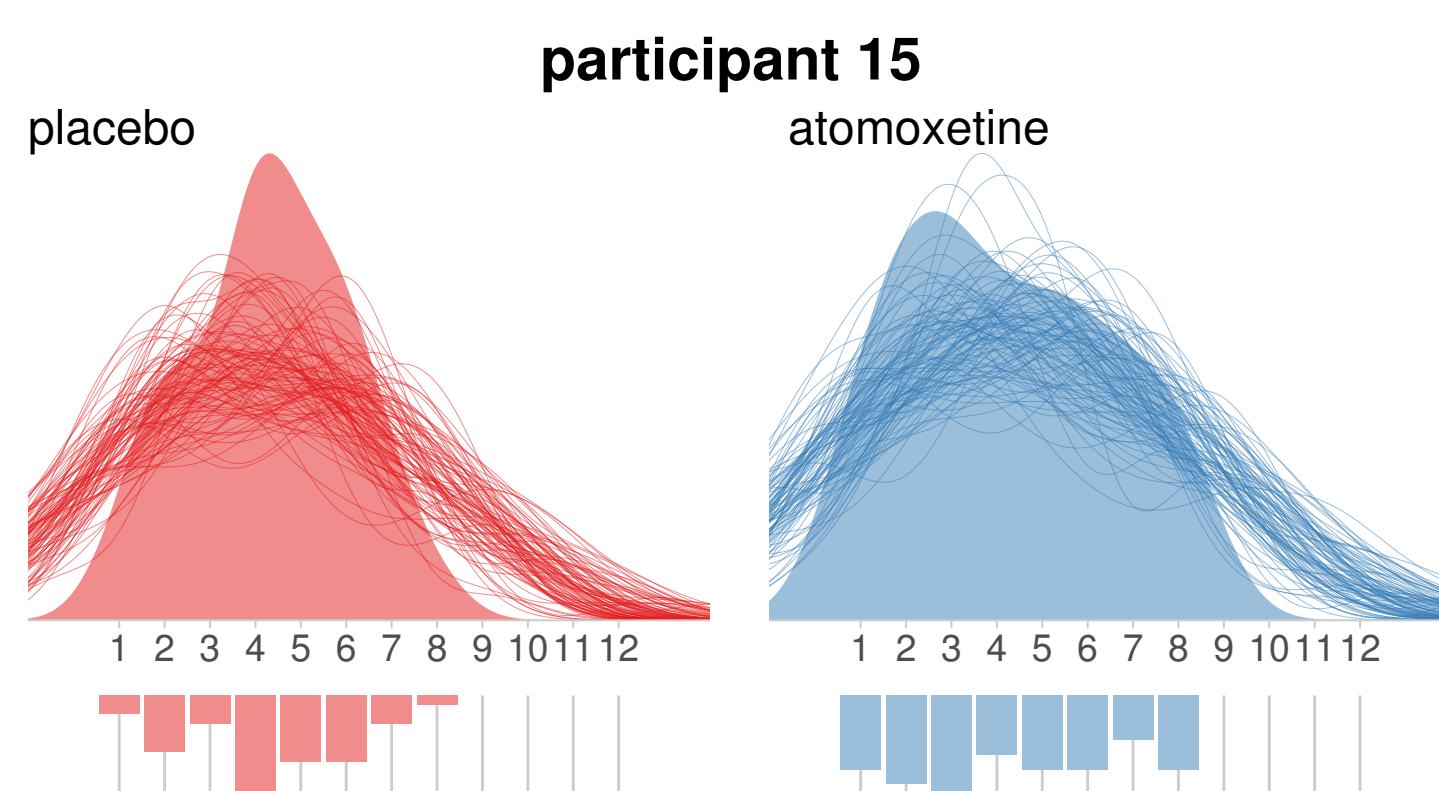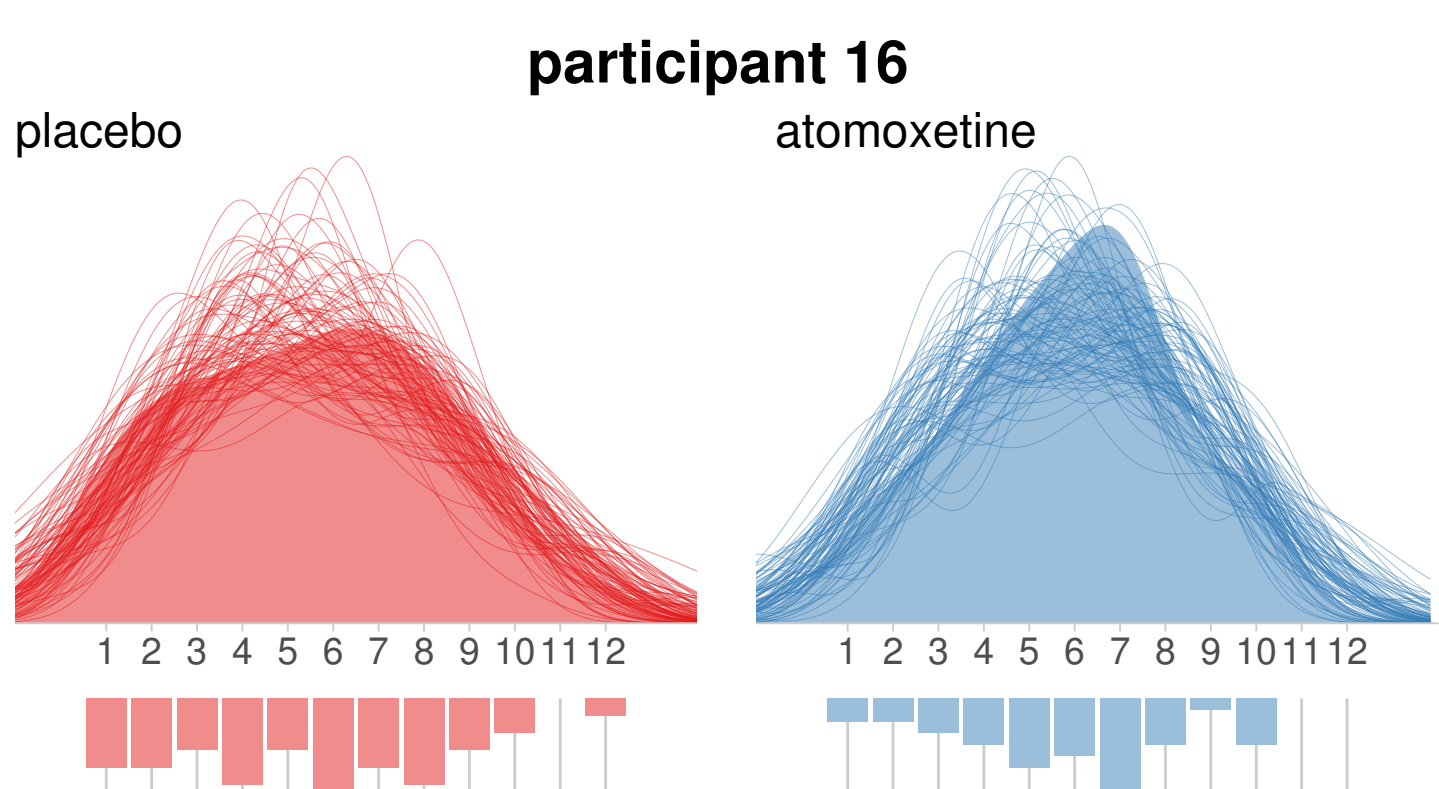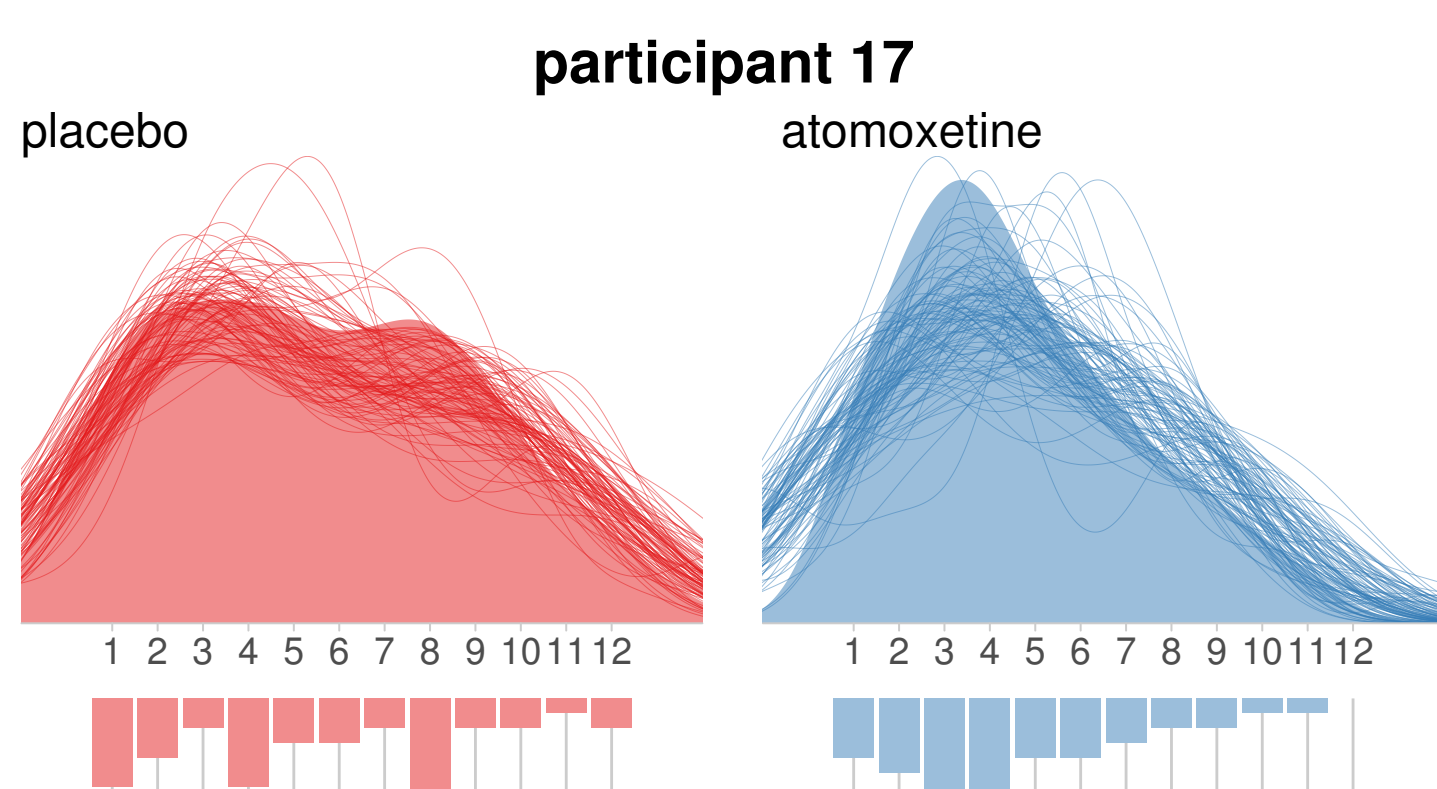

Supplement: pcbi.1010079.s004.pdf [file pcbi.1010079.s004.pdf]
