# Supplementary material for: Noradrenergic deficits contribute to apathy in Parkinson’s disease through the precision of expected outcomes
Source: PubMed Central journal article supplement (PMC9119485; doi:10.1371/journal.pcbi.1010079), 2022-05-09
Supplement: pcbi.1010079.s002.pdf [file pcbi.1010079.s002.pdf]

1

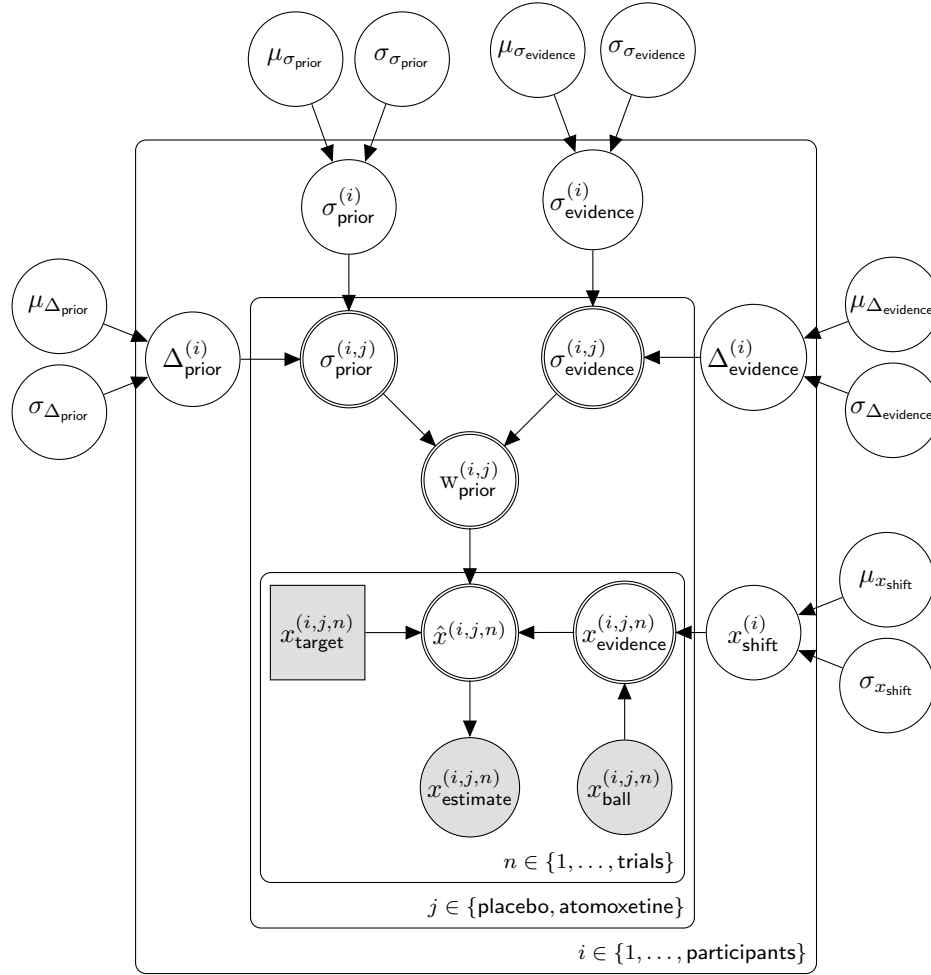

group-level prior SD:

$$\begin{aligned} \mu_{\sigma_{\text{prior}}} &\sim \mathcal{N}(100, 10) & \mu_{\sigma_{\text{prior}}} &> 0 \\ \sigma_{\sigma_{\text{prior}}} &\sim \text{Cauchy}(0, 5) & \sigma_{\sigma_{\text{prior}}} &> 0 \end{aligned}$$

group-level drug effect on prior SD:

$$\begin{aligned} \mu_{\Delta_{\text{prior}}} &\sim \mathcal{N}(0, 10) \\ \sigma_{\Delta_{\text{prior}}} &\sim \text{Cauchy}(0, 5) & \sigma_{\Delta_{\text{prior}}} &> 0 \end{aligned}$$

group-level sensory evidence SD:

$$\begin{aligned} \mu_{\sigma_{\text{evidence}}} &\sim \mathcal{N}(100, 10) & \mu_{\sigma_{\text{evidence}}} &> 0 \\ \sigma_{\sigma_{\text{evidence}}} &\sim \text{Cauchy}(0, 5) & \sigma_{\sigma_{\text{evidence}}} &> 0 \end{aligned}$$

group-level drug effect on sensory evidence SD:

$$\begin{aligned} \mu_{\Delta_{\text{evidence}}} &\sim \mathcal{N}(0, 10) \\ \sigma_{\Delta_{\text{evidence}}} &\sim \text{Cauchy}(0, 5) & \sigma_{\Delta_{\text{evidence}}} &> 0 \end{aligned}$$

group-level sensory evidence shift:

$$\begin{aligned} \mu_{x_{\text{shift}}} &\sim \mathcal{N}(0, 10) \\ \sigma_{x_{\text{shift}}} &\sim \text{Cauchy}(0, 5) & \sigma_{x_{\text{shift}}} &> 0 \end{aligned}$$

---

participant-level prior SD:

$$\sigma_{\text{prior}}^{(i)} \sim \mathcal{N}(\mu_{\sigma_{\text{prior}}}, \sigma_{\sigma_{\text{prior}}}) \quad \sigma_{\text{prior}}^{(i)} > 0$$

participant-level drug effect on prior SD:

$$\Delta_{\text{prior}}^{(i)} \sim \mathcal{N}(\mu_{\Delta_{\text{prior}}}, \sigma_{\Delta_{\text{prior}}})$$

participant-level sensory evidence SD:

$$\sigma_{\text{evidence}}^{(i)} \sim \mathcal{N}(\mu_{\sigma_{\text{evidence}}}, \sigma_{\sigma_{\text{evidence}}}) \quad \sigma_{\text{evidence}}^{(i)} > 0$$

participant-level drug effect on sensory evidence SD:

$$\Delta_{\text{evidence}}^{(i)} \sim \mathcal{N}(\mu_{\Delta_{\text{evidence}}}, \sigma_{\Delta_{\text{evidence}}})$$

participant-level sensory evidence shift:

$$x_{\text{shift}}^{(i)} \sim \mathcal{N}(\mu_{x_{\text{shift}}}, \sigma_{x_{\text{shift}}})$$

---

session-level prior SD:

$$\sigma_{\text{prior}}^{(i,j)} \leftarrow \begin{cases} \sigma_{\text{prior}}^{(i)} & \text{if } j = \text{placebo} \\ \sigma_{\text{prior}}^{(i)} + \Delta_{\text{prior}}^{(i)} & \text{if } j = \text{atomoxetine} \end{cases}$$

session-level sensory evidence SD:

$$\sigma_{\text{evidence}}^{(i,j)} \leftarrow \begin{cases} \sigma_{\text{evidence}}^{(i)} & \text{if } j = \text{placebo} \\ \sigma_{\text{evidence}}^{(i)} + \Delta_{\text{evidence}}^{(i)} & \text{if } j = \text{atomoxetine} \end{cases}$$

session-level prior weighting:

$$w_{\text{prior}}^{(i,j)} \leftarrow \frac{[\sigma_{\text{evidence}}^{(i,j)}]^2}{[\sigma_{\text{evidence}}^{(i,j)}]^2 + [\sigma_{\text{prior}}^{(i,j)}]^2}$$

session-level posterior SD:

$$\sigma_{\hat{x}}^{(i,j)} \leftarrow \sqrt{\frac{[\sigma_{\text{evidence}}^{(i,j)}]^2 \cdot [\sigma_{\text{prior}}^{(i,j)}]^2}{[\sigma_{\text{evidence}}^{(i,j)}]^2 + [\sigma_{\text{prior}}^{(i,j)}]^2}}$$

---

trial-level sensory evidence mean:

$$x_{\text{evidence}}^{(i,j,n)} \leftarrow x_{\text{ball}}^{(i,j,n)} + x_{\text{shift}}^{(i)}$$

trial-level posterior mean:

$$\hat{x}^{(i,j,n)} \leftarrow w_{\text{prior}}^{(i,j)} \cdot x_{\text{target}}^{(i,j,n)} + [1 - w_{\text{prior}}^{(i,j)}] \cdot x_{\text{evidence}}^{(i,j,n)}$$

trial-level estimate of performance:

$$x_{\text{estimate}}^{(i,j,n)} \sim \mathcal{N}(\hat{x}^{(i,j,n)}, \sigma_{\hat{x}}^{(i,j)})$$
