# Supplementary material for: Noradrenergic deficits contribute to apathy in Parkinson’s disease through the precision of expected outcomes
Source: PubMed Central journal article supplement (PMC9119485; doi:10.1371/journal.pcbi.1010079), 2022-05-09
Supplement: pcbi.1010079.s003.pdf [file pcbi.1010079.s003.pdf]

modelled drug effect

$\Delta$  LOOIC

0 10 20 30 40 50 60 70 80

none

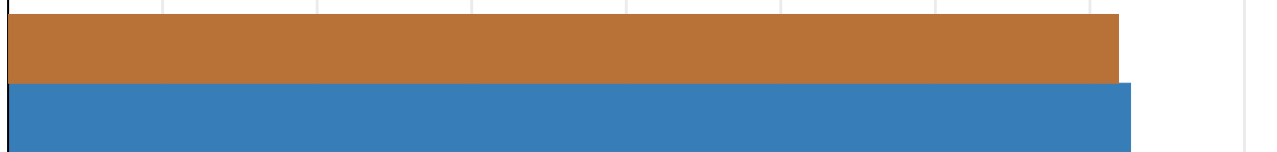

$\sigma_{\text{prior}}$

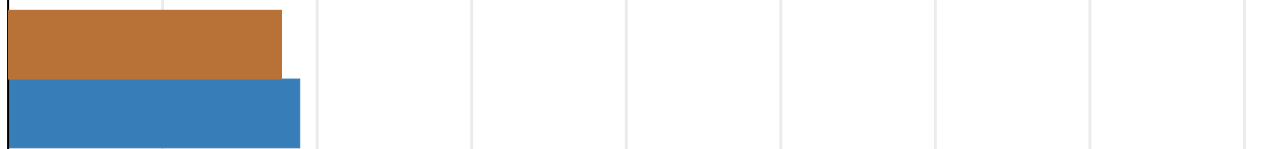

$\sigma_{\text{evidence}}$

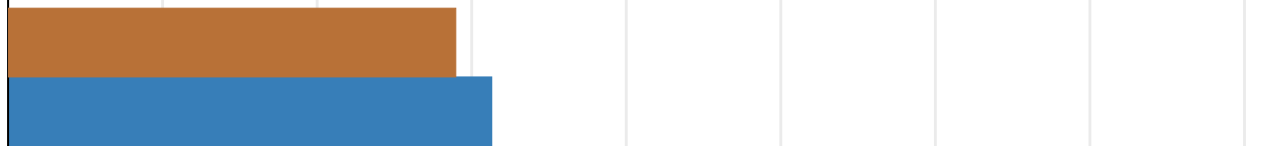

$\sigma_{\text{prior}} \&$

$\sigma_{\text{evidence}}$

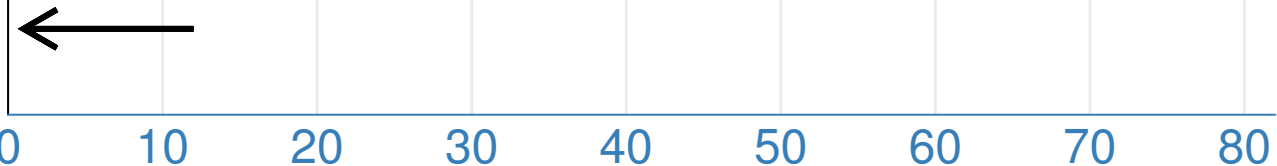

$\Delta$  WAIC

0 10 20 30 40 50 60 70 80
